# Supplementary material
Source: PubMed Central journal article supplement (PMC3371133)
Supplement: NIHMS372513-supplement-ESI.pdf [file NIHMS372513-supplement-ESI.pdf]

## Supplementary Information for: Sub-pixel resolving optofluidic microscope for on-chip cell imaging

Seung Ah Lee,<sup>\*a</sup> Guoan Zheng,<sup>a</sup> Nandini Mukherjee,<sup>a</sup> and Changhui Yang<sup>a,b</sup>

<sup>a</sup>Department of Electrical Engineering, California Institute of Technology, USA.

<sup>b</sup>Department of Bioengineering, California Institute of Technology, USA.

\*salee30@caltech.edu

**Fig S1. Motion of an *Euglena gracilis* cell over 25 frames (a) and the motion vector obtained via our tracing program (b).**

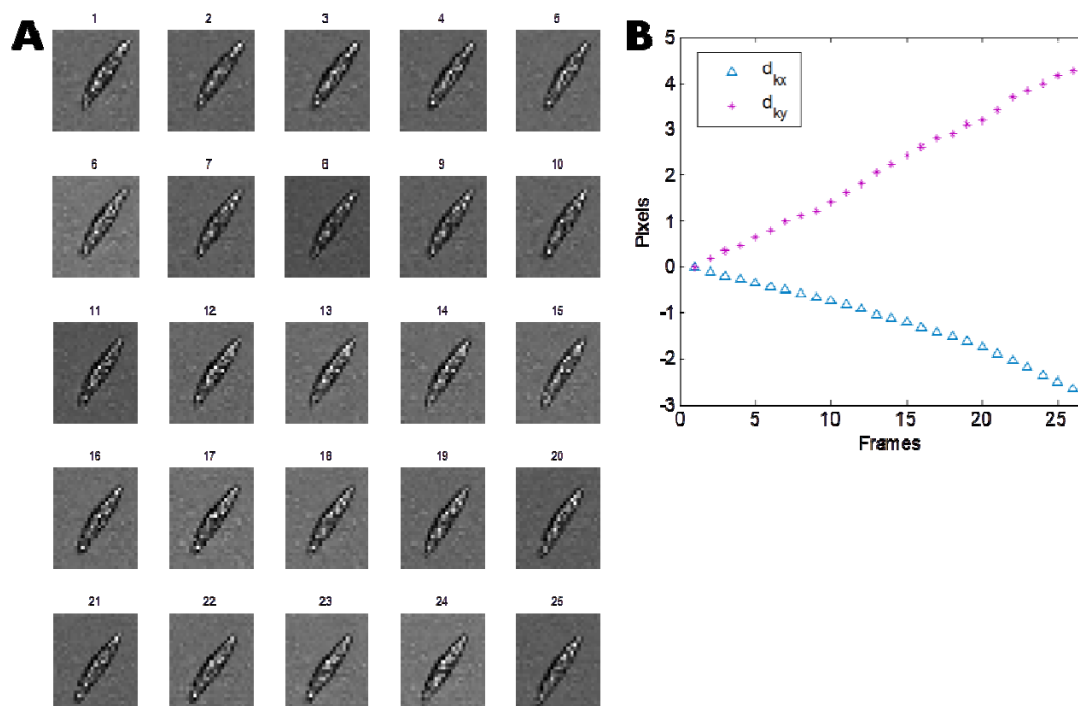

**Fig S2. Motion vector for *Euglena gracilis* corresponding to Fig 2A (A2, A3)**

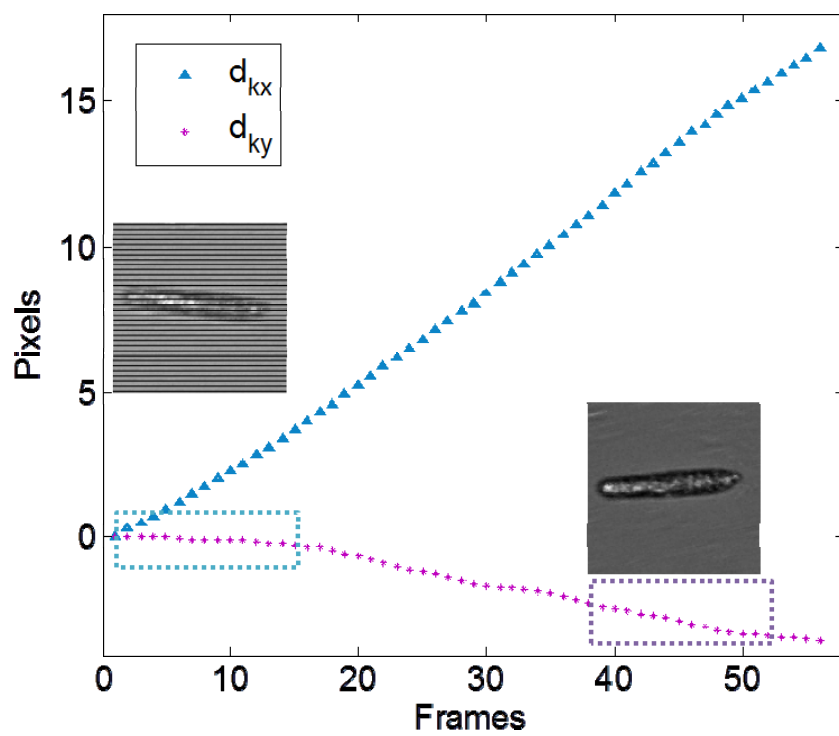

**Fig S3.** Rotation angle measured for the *Euglena gracilis* in Fig 3B by the angle of the microorganism.

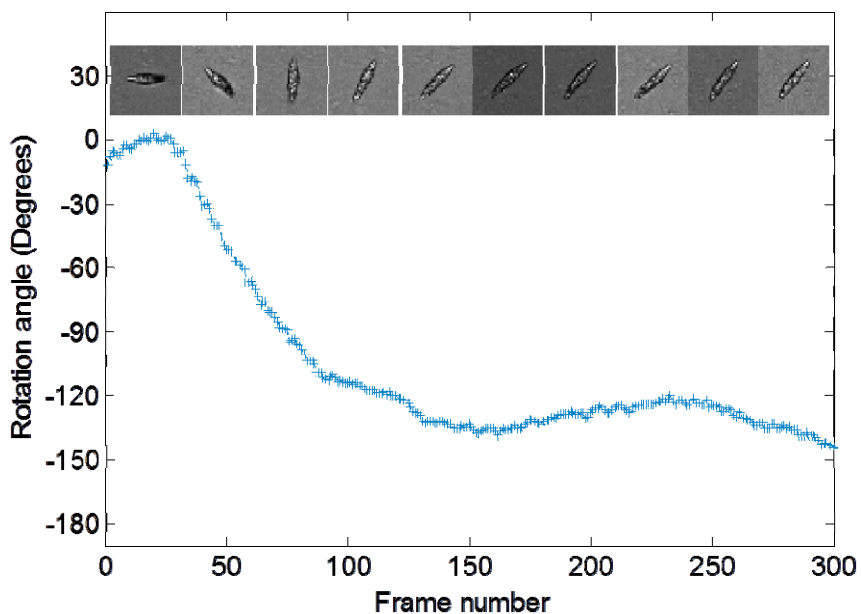

**Fig S4.** Rotation angle measured for the *Euglena gracilis* in Fig 3C by the displacement of the *Euglena gracilis*. The yellow line in inset indicates the trace of the cell in the sequence.

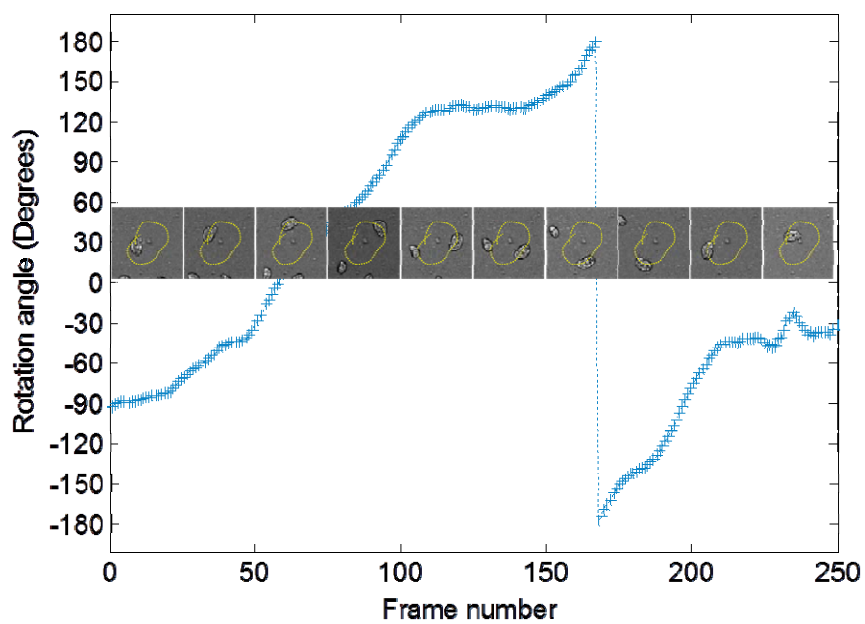

**Table S1. Cell counting results and percentage difference between the machine count and two manual count results.**

|                 | <b>Machine</b> | <b>Observer A</b> | <b>Observer B</b> | <b>Machine-A (%)</b> | <b>Machine-B (%)</b> | <b>A-B (%)</b> |
|-----------------|----------------|-------------------|-------------------|----------------------|----------------------|----------------|
| <b>Image 1</b>  | 112            | 112               | 110               | 0.00                 | 1.80                 | 1.80           |
| <b>Image 2</b>  | 121            | 115               | 119               | 5.08                 | 1.67                 | 3.42           |
| <b>Image 3</b>  | 115            | 117               | 117               | 1.72                 | 1.72                 | 0.00           |
| <b>Image 4</b>  | 102            | 105               | 107               | 2.90                 | 4.78                 | 1.89           |
| <b>Image 5</b>  | 99             | 102               | 99                | 2.99                 | 0.00                 | 2.99           |
| <b>Image 6</b>  | 94             | 97                | 94                | 3.14                 | 0.00                 | 3.14           |
| <b>Image 7</b>  | 103            | 111               | 101               | 7.48                 | 1.96                 | 9.43           |
| <b>Image 8</b>  | 169            | 157               | 161               | 7.36                 | 4.85                 | 2.52           |
| <b>Image 9</b>  | 157            | 154               | 150               | 1.93                 | 4.56                 | 2.63           |
| <b>Image 10</b> | 187            | 199               | 193               | 6.22                 | 3.16                 | 3.06           |
| <b>Image 11</b> | 219            | 222               | 233               | 1.36                 | 6.19                 | 4.84           |
| <b>Image 12</b> | 196            | 197               | 194               | 0.51                 | 1.03                 | 1.53           |
| <b>Image 13</b> | 239            | 245               | 239               | 2.48                 | 0.00                 | 2.48           |
| <b>Image 14</b> | 282            | 302               | 292               | 6.85                 | 3.48                 | 3.37           |
| <b>Average</b>  |                |                   |                   | 3.57                 | 2.51                 | 3.08           |
